# Supplementary material
Source: publisher figshare collection journal article supplement (https://acs.figshare.com/ndownloader/files/4620328)
Supplement: Supplementary file 1 [file 4620328]

# Conductive Block Copolymers Integrated into Polynorbornene-Derived Scaffolds

Hyun A Kang, Hindy E. Bronstein and Timothy M. Swager\*

Department of Chemistry, Massachusetts Institute of Technology,  
77 Massachusetts Avenue, Cambridge, Massachusetts 02139

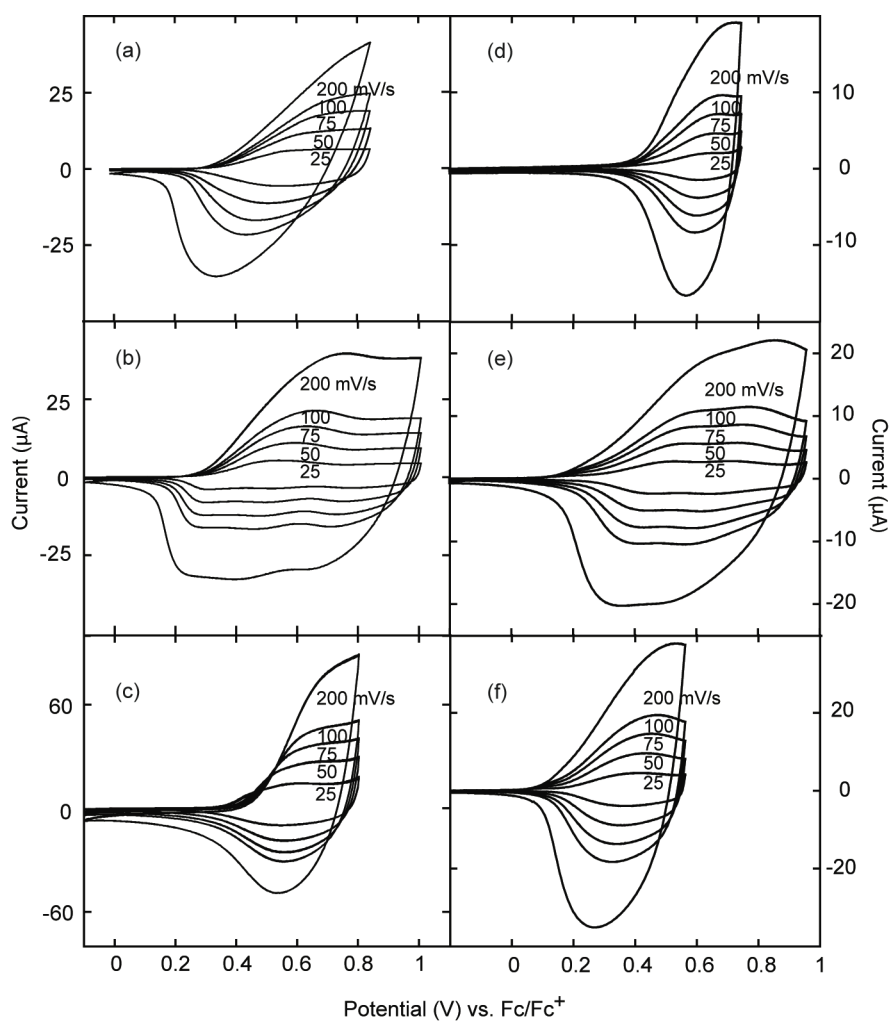

**Figure S1.** CVs of monomers (**4** (a), **5** (b) and **6** (c)) on Pt button electrodes in 0.1 M TBAPF<sub>6</sub> of CH<sub>3</sub>CN solution, and homopolymers (**Poly(4)** (d), **Poly(5)** (e) and **Poly(6)** (f)) on Pt button electrodes in 0.1 M TBAPF<sub>6</sub> of CH<sub>2</sub>Cl<sub>2</sub> solution. Polymer film CVs obtained at 25 - 200 mV/s.

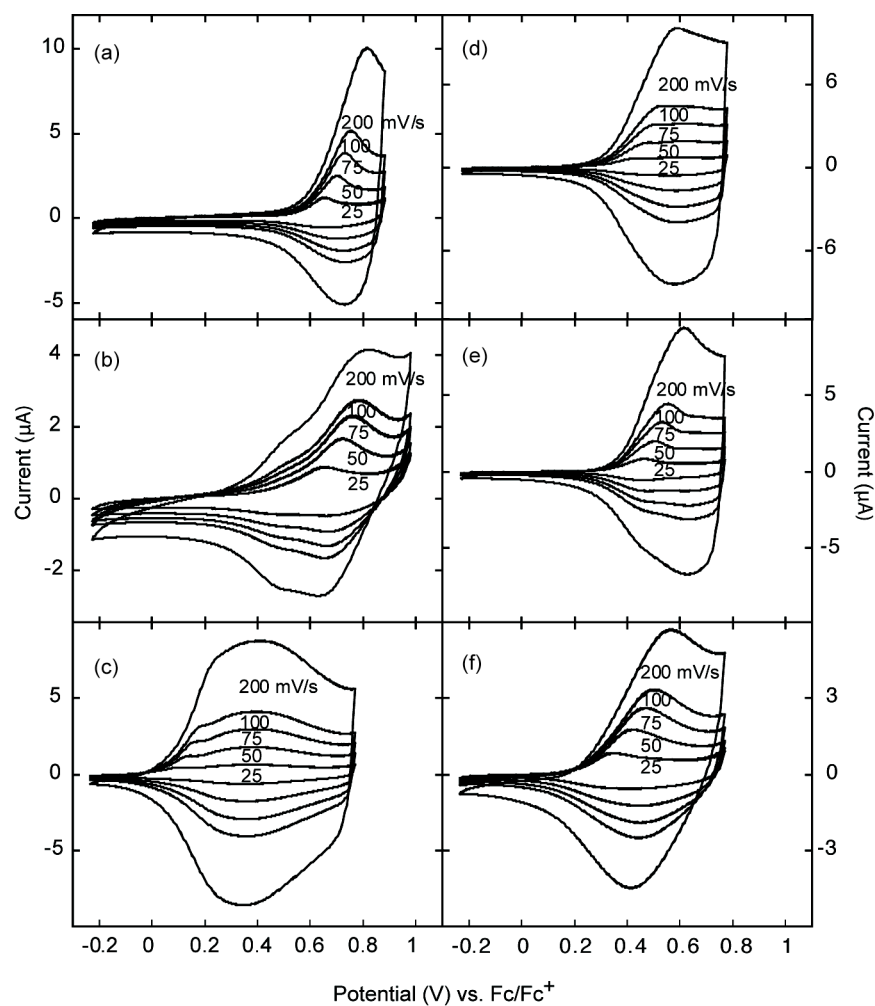

**Figure S2.** CVs of block copolymers (**BCP4** (a), **BCP5** (b) and **BCP6** (c)), and hydrogenated block copolymers (**BCP4** (d), **BCP5** (e) and **BCP6** (f)) on Pt button electrodes in 0.1 M TBAPF<sub>6</sub> of CH<sub>2</sub>Cl<sub>2</sub> solution. Polymer film CVs obtained at 25 - 200 mV/s.

**Table S1.** Molecular weight of block copolymers from GPC

| Polymer     | Mn<br>(first block) | Mn<br>(total) |
|-------------|---------------------|---------------|
| <b>BCP1</b> | 53,700              | 58,600        |
| <b>BCP2</b> | 49,000              | 53,700        |
| <b>BCP3</b> | 55,700              | 69,200        |
| <b>BCP4</b> | 49,000              | 59,300        |
| <b>BCP5</b> | 43,500              | 47,800        |

|             |        |        |
|-------------|--------|--------|
| <b>BCP6</b> | 44,100 | 53,800 |
|-------------|--------|--------|
